# Supplementary material for: IFIT3 Is Increased in Serum from Patients with Chronic Hepatitis B Virus (HBV) Infection and Promotes the Anti-HBV Effect of Interferon Alpha via JAK-STAT2 In Vitro
Source: PubMed Central journal article supplement (PMC9769971; doi:10.1128/spectrum.01557-22), 2022-10-31
Supplement: spectrum.01557-22-s0001.pdf [file spectrum.01557-22-s0001.pdf]

**Table S1****Primer sequence of target gene (human source)**

| Gene name    | primer | Primer sequence (5'-3') |
|--------------|--------|-------------------------|
| <i>GAPDH</i> | FW     | GGAGCGAGATCCCTCCAAAAT   |
|              | RV     | GGCTGTTGTCATACTTCTCATGG |
| <i>IFIT3</i> | FW     | ATGGTAGTGAGGAAATGGGC    |
|              | RV     | TGTCTTCCTATCGTCCTACCC   |
| <i>MXA</i>   | FW     | GCATCCCACCCTCTATTACTG   |
|              | RV     | AGTCAATGAGGTCGATGCAG    |
| <i>OAS1</i>  | FW     | TGAGAAGGCAGCTCACGAAA    |
|              | RV     | CATCGTCTGCACTGTTGCTT    |
| <i>PKR</i>   | FW     | CGATACATGAGCCCAGAACAG   |
|              | RV     | AGAATTAGCCCCAAAGCGTAG   |

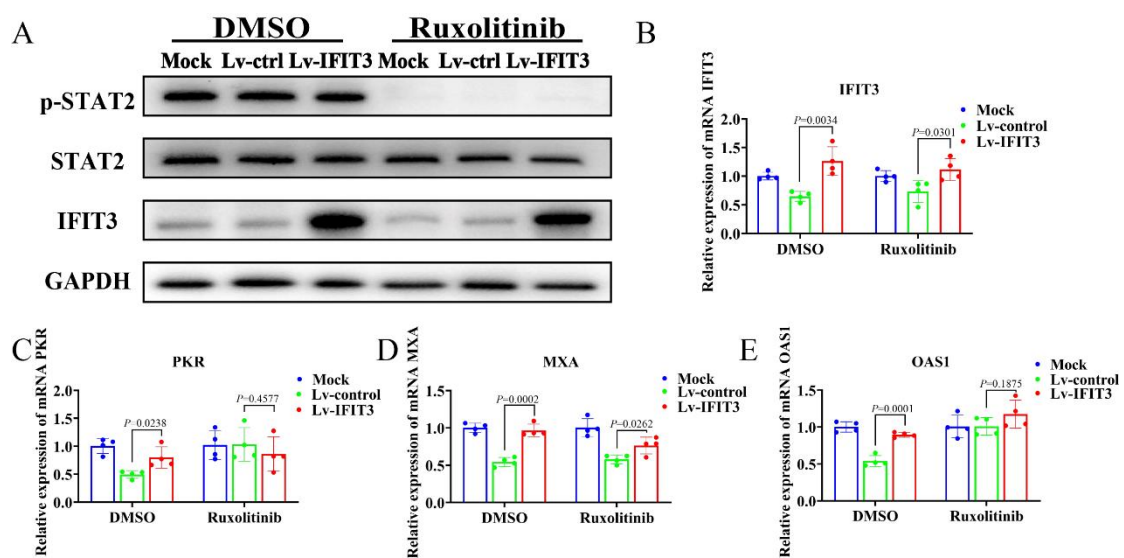**Figure S1. Inhibition the phosphorylation of STAT2 weaken the role of IFIT3 in strengthening IFN- $\alpha$  effect**

(A) HL-7702 cells with enhanced IFIT3 were pre-treated with Ruxolitinib for 6 h before treatment with IFN- $\alpha$  (1,000 IU/ml) for 30 min. Cells were treated with dimethyl sulfoxide (DMSO), which served as a negative control. (B-E) HL-7702 cells with enhanced IFIT3 were pre-treated with Ruxolitinib/DMSO for 6 h, and then cultured with IFN- $\alpha$  (1,000 IU/ml) for 12 h. A control (without Ruxolitinib/DMSO) was used in each treatment group. The experiments were performed in triplicate and data were expressed as mean  $\pm$  SD.
